# Supplementary material for: Nanosized porous artificial enzyme as a pH-sensitive doxorubicin delivery system for joint enzymatic and chemotherapy towards tumor treatment
Source: Royal Society of Chemistry journal article supplement (doi:10.1039/d2nj02031a), 2022-01-01
Supplement: d2nj02031a1.pdf [file d2nj02031a1.pdf]

## ***Supporting Information***

# **Nano-sized Porous Artificial Enzyme as pH-Sensitive Doxorubicin Delivery System for Joint Enzymatic and Chemotherapy towards Tumor Treatment**

Zhilu Xu,<sup>†</sup> Ting Wang,<sup>†</sup> Jing Li,<sup>†</sup> Fang Zhang,<sup>†</sup> Han Lou, Jian Zhang, Wenhua Zhang,\* Weifen Zhang\* Baolong

Zhou\*

Weifang Medical University, Weifang, 261053, Shandong, P. R. China

<sup>†</sup> These authors contribute equal to this article.

E-mail: [zhoubalong@wfmw.edu.cn](mailto:zhoubalong@wfmw.edu.cn)

## **Contents**

### **Section 1. Materials and Methods**

### **Section 2. XPS**

### **Section 3. Size and Zeta Potential**

### **Section 4. The catalytic activity of HF-900 enzymes**

### **Section 5. Flow cytometry assay**

### **Section 6. Supporting Table**

### **Section 7. Supporting References**

## **Section 1. Materials and methods**

### **Synthesis of the HF-POP**

Initially, freshly distilled pyrrole (0.48 mL, 6.96 mmol) and hexa-(4-aldehyde-phenoxy)-cyclotriphosphazene (1.0 g, 1.16 mmol) were mixed, following by the injection of propanoic acid (55 mL) and nitrobenzene (36 mL). Then,  $\text{FeCl}_2 \cdot 4\text{H}_2\text{O}$  (0.28 g, 1.39 mmol) was added into the above mixture. Under the protection of  $\text{N}_2$ , the mixture was heated to reflux for 2 days and slowly cooled to room temperature. A black powder was obtained in the meantime. The obtained product was filtered and washed with DMF until the filtrate was colourless. Then, the as-prepared solid was frequently washed with ethanol and tetrahydrofuran. Finally, the obtained product was dried in a vacuum oven. Subsequently, the obtained solid was rigorously washed by Soxhlet extraction for 24 h with dichloromethane and methanol, respectively. Finally, the as-synthesized HF-POP was dried overnight at 120 °C in a vacuum oven.<sup>1</sup> (Yield: 1.36 g, 95%).

### **Synthesis of the HF-900**

HF-900 were prepared via direct pyrolysis of Fe-chelating porous organic polymers at 900 °C at kept for 2 hours under the atmosphere of argon.<sup>2</sup>

### **Synthesis of the HF-900-DOX**

DOX and HF-900 were suspended in 2 mL water with stirring at room temperature for 8 h. The mass of DOX in different mass ratio to HF-900 was 2:1, 1:2, 1:4, and 1:6, respectively. The DOX was firmly absorbed into the pores of the HF-900 during agitation, due to the structural similarity between the DOX and carries.<sup>3</sup>

## Section 2. XPS

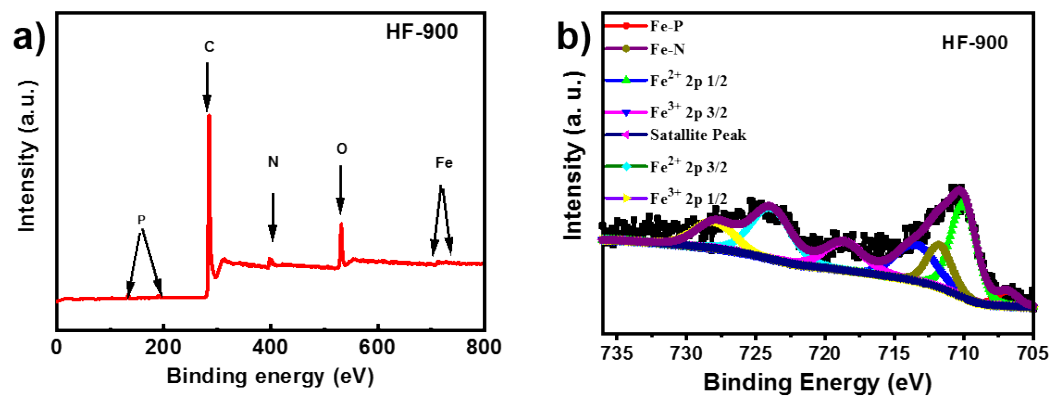

**Figure S1.** XPS of HF-900. a) XPS survey spectrum of HF-900; b) high resolution Fe 2p XPS of HF-900.

## Section 3. Size and Zeta Potential

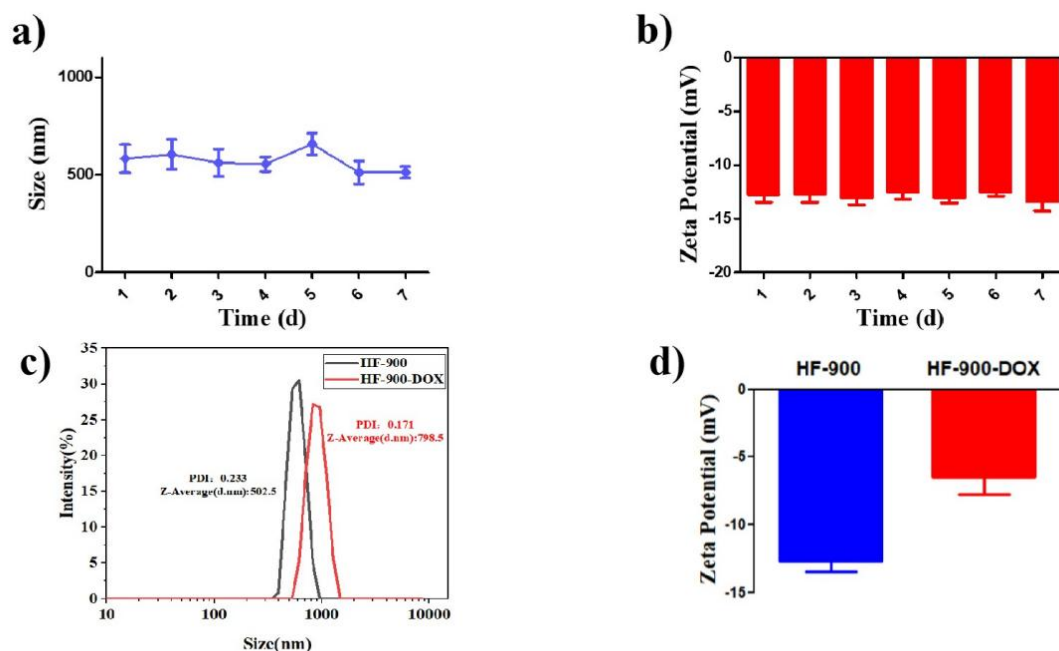

**Figure S2.** Size a) and Zeta Potential b) changes of HF-900 in aqueous solution at different time. Size c) and Zeta Potential d) of HF-900 and HF-900-DOX.

## Section 4. The catalytic activity of HF-900 enzymes

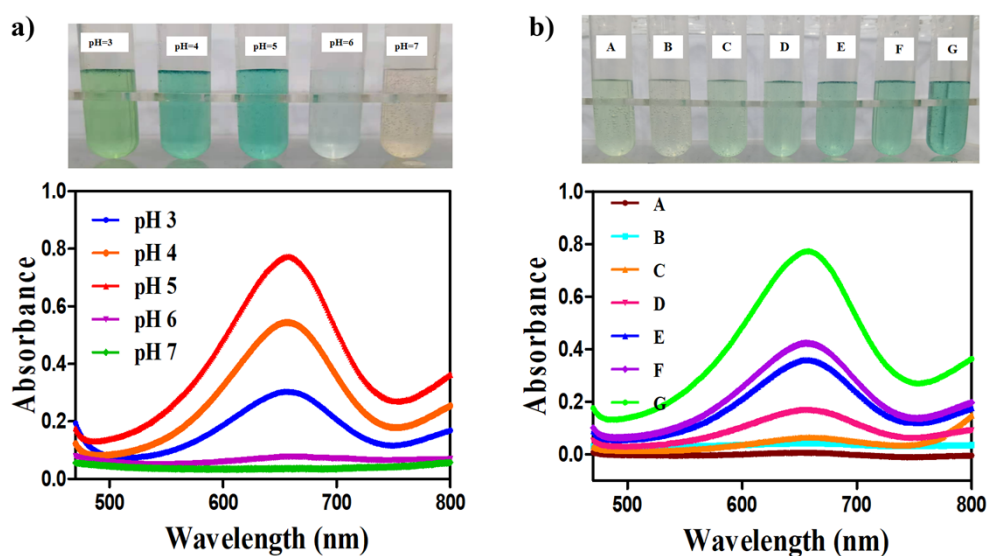

**Figure S3.** UV-Visible absorption spectra of different reaction systems. a) The effect of pH on absorption value with HF-900. b) The absorption value with different concentration of HF-900: (A) TMB + H<sub>2</sub>O<sub>2</sub>, (B) TMB + HF-900, (C) TMB + H<sub>2</sub>O<sub>2</sub> + 20  $\mu\text{g mL}^{-1}$  HF-900, (D) TMB + H<sub>2</sub>O<sub>2</sub> + 50  $\mu\text{g mL}^{-1}$  HF-900, (E) TMB + H<sub>2</sub>O<sub>2</sub> + 100  $\mu\text{g mL}^{-1}$  HF-900, (F) TMB + H<sub>2</sub>O<sub>2</sub> + 150  $\mu\text{g mL}^{-1}$  HF-900 (G) TMB + H<sub>2</sub>O<sub>2</sub> + 200  $\mu\text{g mL}^{-1}$  HF-900.

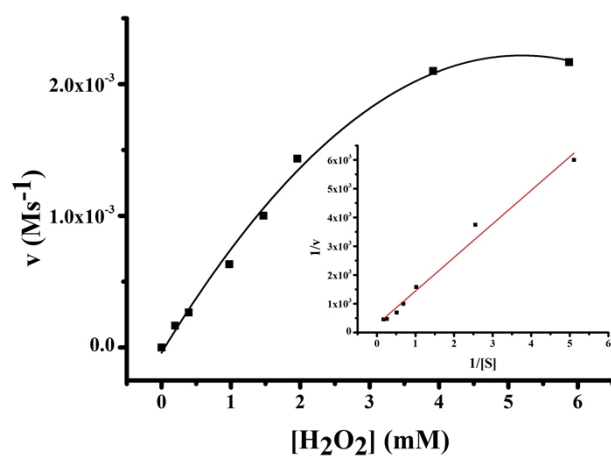

**Figure S4.** The enzymatic kinetic assay of HF-900 nanoparticles.

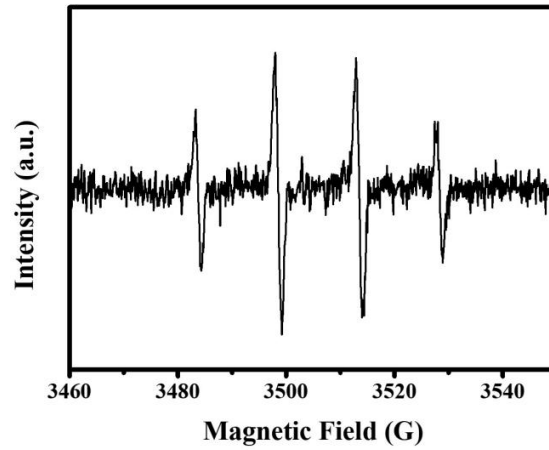

**Figure S5.** ESR spectra for detection of hydroxyl radical in the presence of DMPO.

### Section 5. Flow cytometry assay

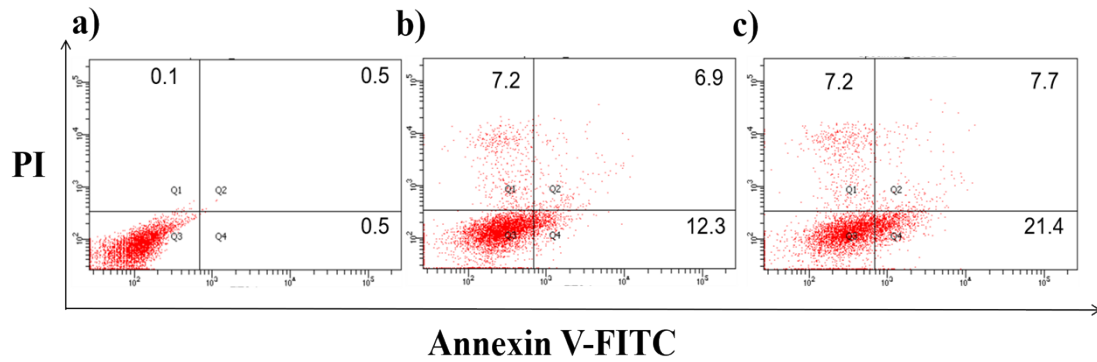

**Figure S6.** Analysis of 231 cells using Annexin V-FITC and Propidium Iodide,<sup>4</sup> 231 cells were treated with PBS (a), 100  $\mu\text{g mL}^{-1}$  (b) or 200  $\mu\text{g mL}^{-1}$  (c) of HF-900.

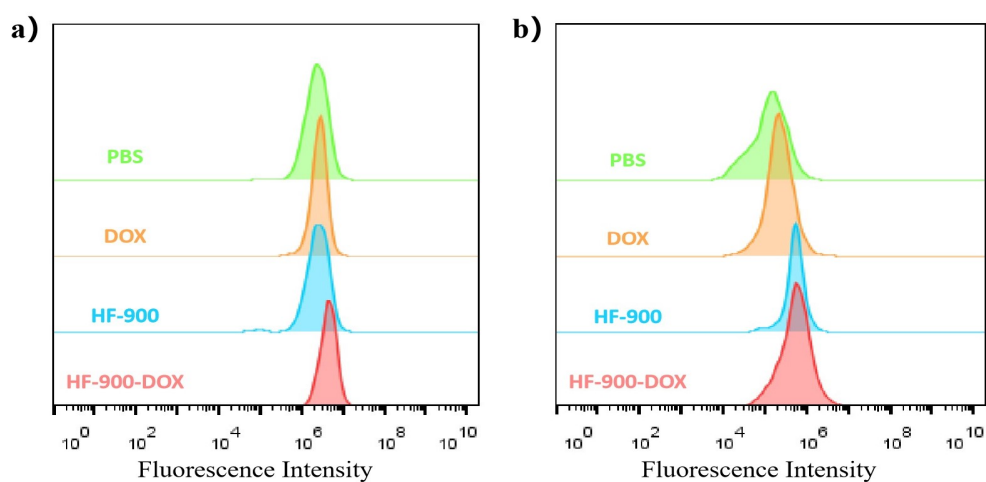

**Figure S7.** Flow cytometry of intracellular ROS: a) ROS expression level of 231 cells; b) ROS expression level of 4T1 cells.

## Section 6. Supporting Tables

**Table S1.** Results of Drug Loading (%) and Encapsulation Efficiency (%) (Mean  $\pm$  SD, n = 3).

| mass ratio (material:drug) | loading capacity | encapsulation efficiency |
|----------------------------|------------------|--------------------------|
| 2:1                        | 15.20 $\pm$ 2.14 | 35.95 $\pm$ 5.97         |
| 1:1                        | 19.43 $\pm$ 2.99 | 24.23 $\pm$ 4.53         |
| 1:2                        | 23.79 $\pm$ 2.16 | 15.64 $\pm$ 1.85         |
| 1:4                        | 49.64 $\pm$ 2.18 | 24.10 $\pm$ 2.10         |
| 1:6                        | 61.28 $\pm$ 3.15 | 26.56 $\pm$ 3.42         |

**Table S2.** Elemental analysis<sup>5</sup> and ICP analysis<sup>6</sup> of HF-900 and HF-900-DOX. The af represents atomic fraction and the mf represents mass fraction.

| Sample     | C (mf%) | N (mf%) | O (mf%) | P (mf%) | Fe (mf%) |
|------------|---------|---------|---------|---------|----------|
| HF-900     | 87.8    | 0.7955  | 8.275   | 2.74    | 0.394    |
| HF-900-DOX | 91.0    | 0.206   | 7.785   | 0.5675  | 0.4635   |

  

| Sample     | C (af%) | N (af%) | O (af%) | P (af%) | Fe (af%) |
|------------|---------|---------|---------|---------|----------|
| HF-900     | 91.6    | 0.7085  | 6.485   | 1.1075  | 0.08815  |
| HF-900-DOX | 93.5    | 0.1825  | 6.005   | 0.2265  | 0.1027   |

## Section 7. Supporting References

- (1) Pan, Q.; Xu, Z.; Deng, S.; Zhang, F.; Li, H.; Cheng, Y.; Wei, L.; Wang, J.; Zhou, B. A Mechanochemically Synthesized Porous Organic Polymer Derived CQD/Chitosan–Graphene Composite Film Electrode for Electrochemiluminescence Determination of Dopamine. *RSC Adv.* **2019**, *9* (67), 39332–39337. <https://doi.org/10.1039/C9RA06912G>.
- (2) Zhou, B.; Yan, F.; Li, X.; Zhou, J.; Zhang, W. An Interpenetrating Porous Organic Polymer as a Precursor for FeP/Fe<sub>2</sub>P-Embedded Porous Carbon toward a PH-Universal ORR Catalyst. *ChemSusChem* **2019**, *12* (4), 915–923. <https://doi.org/10.1002/cssc.201802369>.
- (3) Liu, Z.; Li, T.; Han, F.; Wang, Y.; Gan, Y.; Shi, J.; Wang, T.; Akhtar, M. L.; Li, Y. A Cascade-Reaction Enabled Synergistic Cancer Starvation/ROS-Mediated/Chemotherapy with an Enzyme Modified Fe-Based MOF. *Biomater. Sci.* **2019**, *7* (9), 3683–3692. <https://doi.org/10.1039/c9bm00641a>.

- (4) Trachootham, D.; Zhou, Y.; Zhang, H.; Demizu, Y.; Chen, Z.; Pelicano, H.; Chiao, P. J.; Achanta, G.; Arlinghaus, R. B.; Liu, J.; et al. Selective Killing of Oncogenically Transformed Cells through a ROS-Mediated Mechanism by  $\beta$ -Phenylethyl Isothiocyanate. *Cancer Cell* **2006**, *10* (3), 241–252. <https://doi.org/10.1016/j.ccr.2006.08.009>.
- (5) Huo, M.; Wang, L.; Chen, Y.; Shi, J. Tumor-Selective Catalytic Nanomedicine by Nanocatalyst Delivery. *Nat. Commun.* **2017**, *8* (1), 357. <https://doi.org/10.1038/s41467-017-00424-8>.
- (6) Liu, T.; Liu, W.; Zhang, M.; Yu, W.; Gao, F.; Li, C.; Wang, S.-B.; Feng, J.; Zhang, X.-Z. Ferrous-Supply-Regeneration Nanoengineering for Cancer-Cell-Specific Ferroptosis in Combination with Imaging-Guided Photodynamic Therapy. *ACS Nano* **2018**, *12* (12), 12181–12192. <https://doi.org/10.1021/acsnano.8b05860>.
